# Supplementary material for: XFCT-MRI hybrid multimodal contrast agents for complementary imaging
Source: Royal Society of Chemistry journal article supplement (doi:10.1039/d2nr05829d), 2022-12-28
Supplement: d2nr05829d3.pdf [file d2nr05829d3.pdf]

## Supporting Information

### XFCT-MRI Hybrid Multimodal Contrast Agents for Complementary Imaging

Giovanni M. Saladino, Carmen Vogt, Bertha Brodin, Kian Shaker, Nuzhet I. Kilic, Kenth Andersson, Marie Arsenian-Henriksson, Muhammet S. Toprak, Hans M. Hertz

\*Corresponding authors. Email: saladino@kth.se, hans.hertz@biox.kth.se

#### Supporting Text

##### *Magnetization measurements*

The magnetization (M) of an ensemble of superparamagnetic nanoparticles is:

$$M = M_S \int_0^{\infty} L(x) f(y) dy$$

where  $M_S$  is the saturation magnetization<sup>41</sup>.  $L(x)$  is the Langevin function:

$$L(x) = \coth x - \frac{1}{x}$$

$$x = \frac{M'_S V(y) B}{kT}$$

with  $M'_S$  being the domain magnetization,  $V(y)$  the nanoparticle volume,  $B$  the magnetic flux density,  $k$  the Boltzmann's constant, and  $T$  is the absolute temperature.  $f(y)$  is the lognormal size distribution, as follows:

$$f(y) = \frac{1}{y\sigma_M\sqrt{2\pi}} \exp\left[-\frac{\ln^2 y}{2\sigma_M}\right]$$

where  $y = D/D_M$ .  $D$  is the magnetic diameter and  $D_M$  its median value<sup>41</sup>.

By fitting the magnetization curve as a function of the magnetic field with the given formula<sup>42-43</sup>, it is possible to estimate the saturation magnetization, magnetic diameter, and its distribution ( $M_S$ ,  $D_M$  and  $\sigma_M$ ).

### Sensitivity studies

The contrast to noise ratio (CNR) for both MRI and XFCT was defined as follows:

$$\text{CNR} = \frac{|\langle S_{\text{NP}} \rangle - \langle S_0 \rangle|}{\sigma_N}$$

where  $S_{\text{NP}}$  and  $S_0$  are the pixel intensities within the inner (NP-containing) radius and circular crown (background) of the phantoms, respectively. The average intensities are calculated as the sum of the pixel intensities, divided by the number of pixels.  $\sigma_N$  is the standard deviation of the background signal.

Phantoms with four different NP concentrations were prepared. The MRI signal is proportional to a decaying exponential, as follows:

$$S = k e^{-R_2^* \cdot \text{TE}}$$

$$S = k e^{-(r_2^*[\text{Fe}] + r_0) \cdot \text{TE}}$$

$$S = S_0 e^{-r_2^*[\text{Fe}] \cdot \text{TE}}, \text{ with } S_0 = k e^{-r_0 \cdot \text{TE}}$$

with  $R_2^*$  as transverse relaxation rate constituted by a solvent-dependent term ( $r_0$ ) and contrast agent concentration-dependent term ( $r_2^*$ ).  $k$  is a constant term. The CNR for MRI results in:

$$\text{CNR} = \frac{k}{\sigma_N} e^{-r_0 \cdot \text{TE}} \left( 1 - e^{-r_2^*[\text{Fe}] \cdot \text{TE}} \right) \propto \left( 1 - e^{-r_2^*[\text{Fe}] \cdot \text{TE}} \right)$$

The XFCT intensity is linearly dependent upon the XRF-active element (Ru) concentration. The offset is given by the background intensity  $S_0$ , from the Compton scattering:

$$S_{\text{NP}} = S_0 + k [\text{Ru}]$$

$$\text{CNR} = \frac{k}{\sigma_N} [\text{Ru}] \propto [\text{Ru}]$$

The CNR is then linear as a function of  $[\text{Ru}]$ . A decaying exponential and linear fit with a coefficient of determination ( $R^2$ ) of 98% permitted the estimation of the MRI and XFCT sensitivity, respectively.

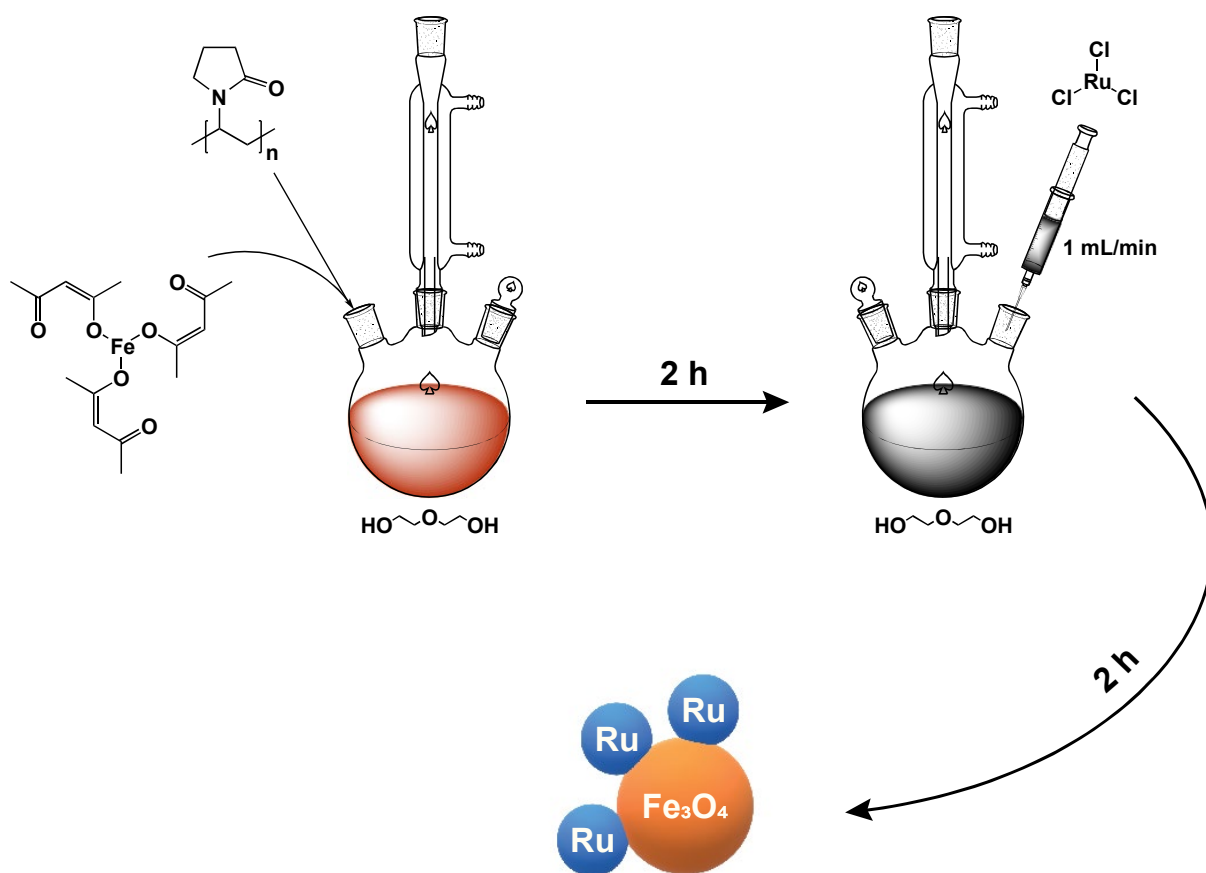

**Fig. S1.**

Schematic representation of the synthesis conditions.  $\text{Fe}(\text{acac})_3$  and PVP were dissolved in DEG with magnetic stirring. The solution was kept reacting at the refluxing temperature for 2 h. SPION formation turned the dispersion from dark orange to black.  $\text{RuCl}_3$  in a water/DEG mixture was injected into the flask (1 mL/min). The dispersion was reacted for other 2 h and cooled down, leading to the formation of Ru-SPIONs.

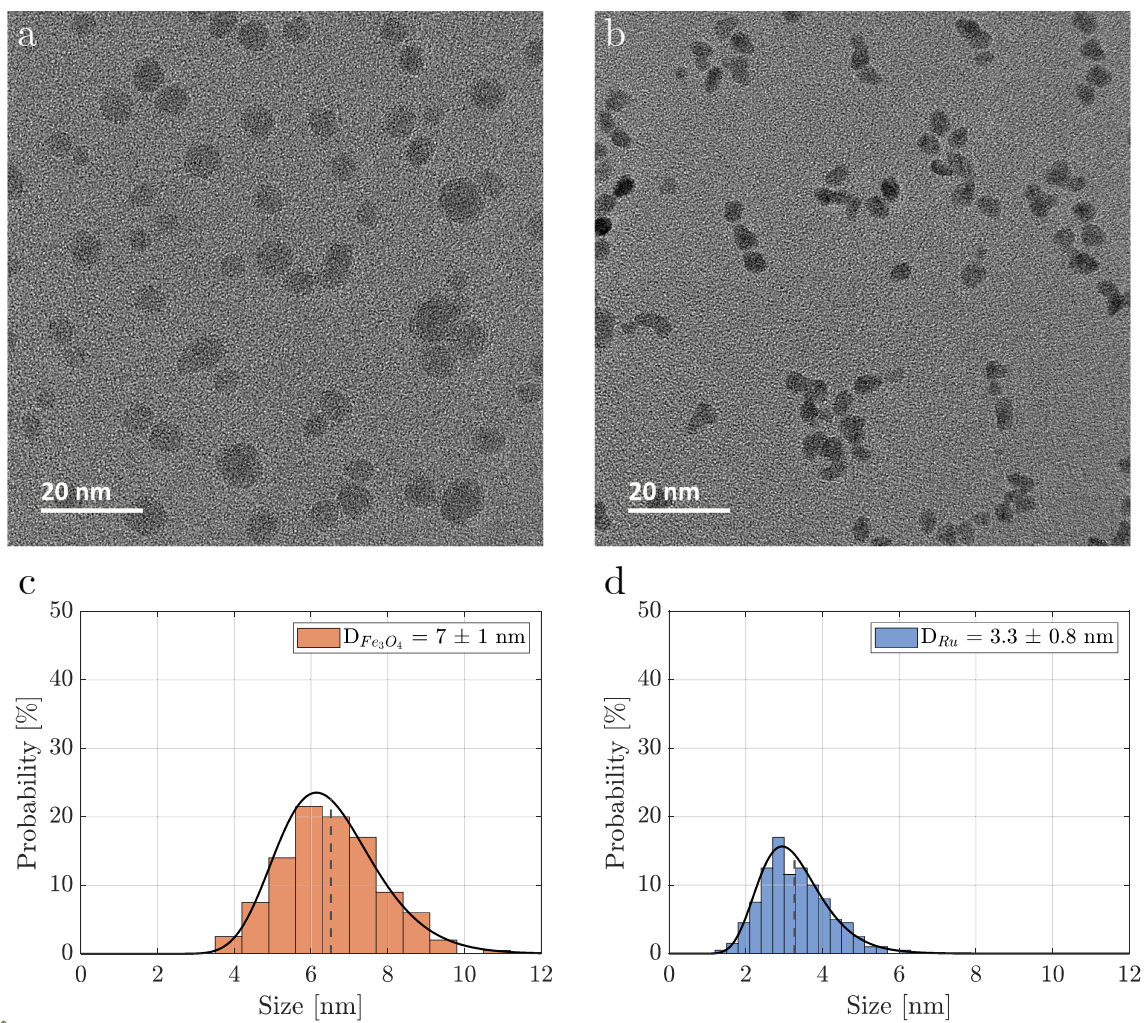

**Fig. S2.**

SPIONs and Ru NPs. TEM micrographs of SPIONs (a) and Ru NPs (b) showing the NP morphology. Size distribution histogram, obtained from the TEM micrographs, and lognormal fit (c, d) with  $R^2$  equal to 98% and 96%, respectively.

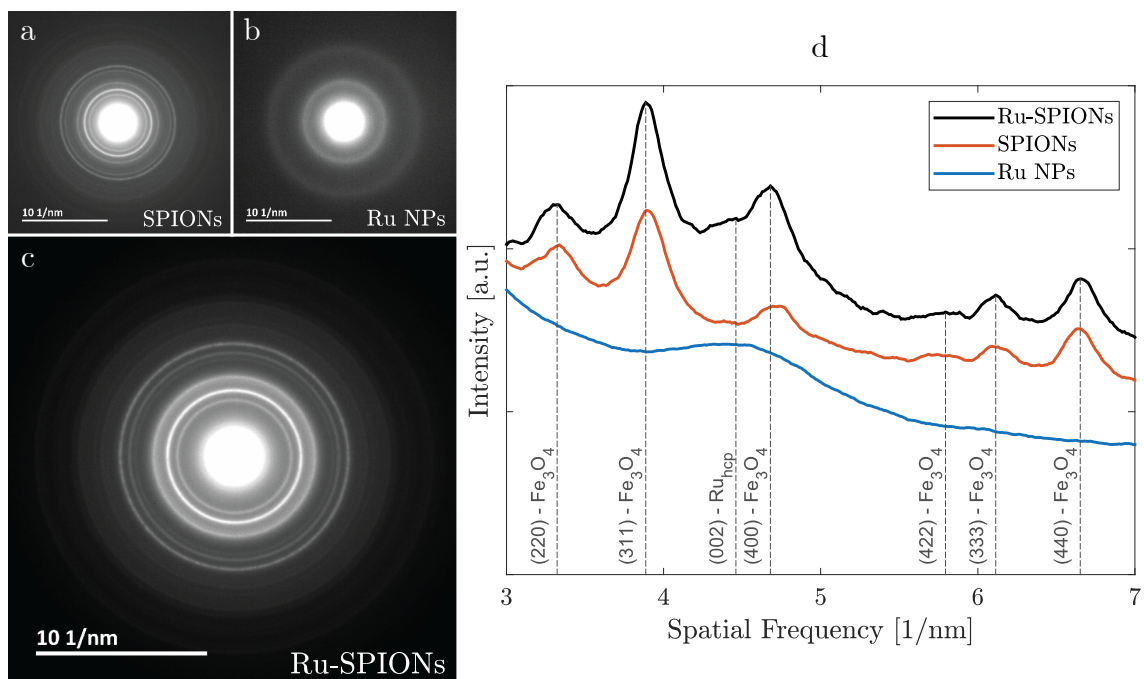

**Fig. S3.**

Crystal structure analysis with the selected area electron diffraction (SAED) of SPIONs (**a**), Ru NPs (**b**), and Ru-SPIONs (**c**). Linear diffraction profiles (**d**) highlighting the crystal planes of the two NP species. The peaks reveal hcp structure for Ru NPs (COD 9008513) and fcc structure for SPIONs (magnetite/maghemite, CODs 1011032/9006316) in both the bare and hybrid nanostructures.

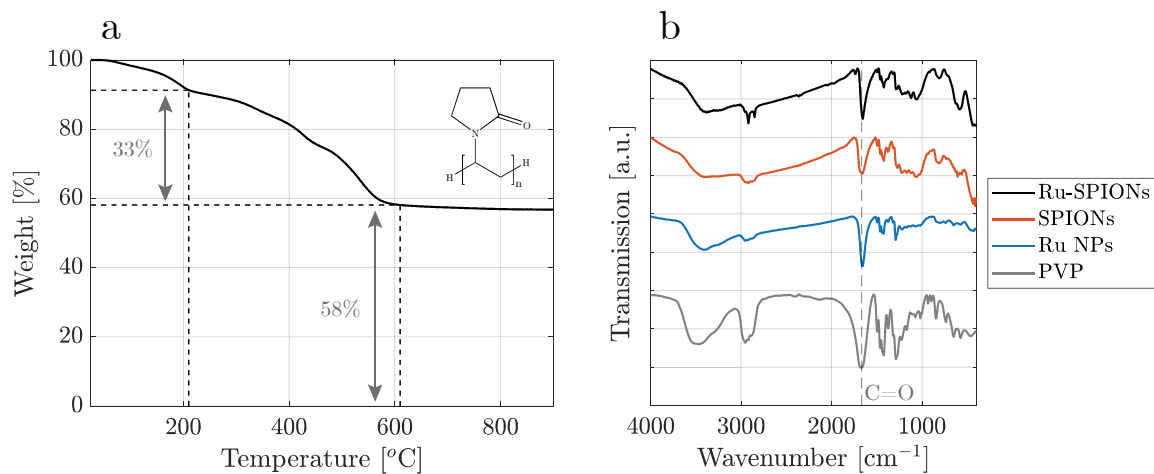

**Fig. S4.**

TGA thermogram of Ru-SPIONs (A), revealing the weight percentage of the organic and inorganic content. Below 200 °C, water desorption is detected. The weight loss between 200 and 600 °C is ascribed to the pyrolysis of PVP on the NP surface. Its molecular structure is schematically shown. FT-IR spectra (B) of Ru-SPIONs, SPIONs, Ru NPs and PVP powder are compared, and the main band is associated with the C=O stretching vibration from PVP. A shift between the unbound (1676 cm<sup>-1</sup>) and bound (1656 ± 1 cm<sup>-1</sup>) PVP is observed, highlighting the binding and capping mechanisms of PVP on the NP surface.

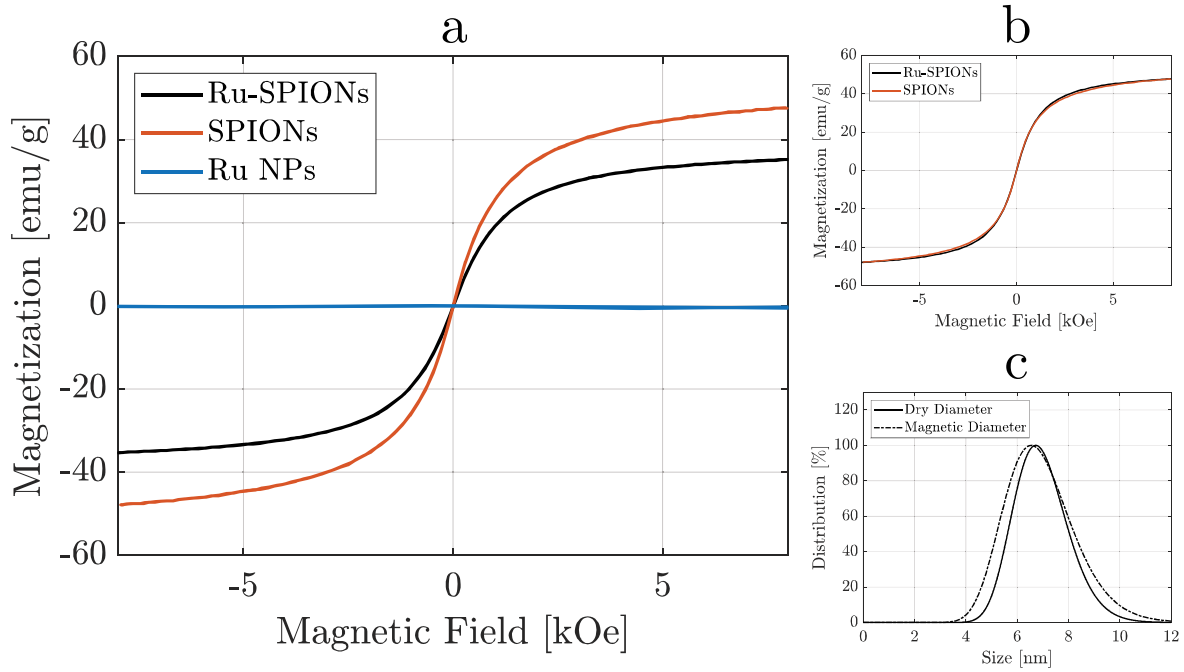

**Fig. S5.**

Magnetization curve (a) obtained by vibrating sample magnetometer (VSM) at 300 K of Ru-SPIONs, SPIONs, and Ru NPs, considering the inorganic content ( $[\text{Fe}_3\text{O}_4] + [\text{Ru}]$ ). The saturation magnetization was estimated as  $38.4 \pm 0.2$  and  $53.2 \pm 0.3$  emu/g for Ru-SPIONs and SPIONs, respectively. The coercive field (Normalized magnetization curve (b) of Ru-SPIONs and SPIONs, weighted only by  $[\text{Fe}_3\text{O}_4]$ ). The percentual difference in saturation magnetization per magnetite amount for the two NP kinds,  $\Delta[M_S(\text{Ru-SPIONs}); M_S(\text{SPIONs})]_{\text{Fe}}$ , is equal to  $\approx 2\%$ , ascribed to random errors. Comparison of the size distribution functions (c) of Ru-SPIONs, obtained from TEM micrograph and magnetic fit, with average diameters of  $7 \pm 1$  and  $6.8 \pm 1.4$  nm ( $\sigma_M = 0.2$ ), respectively.

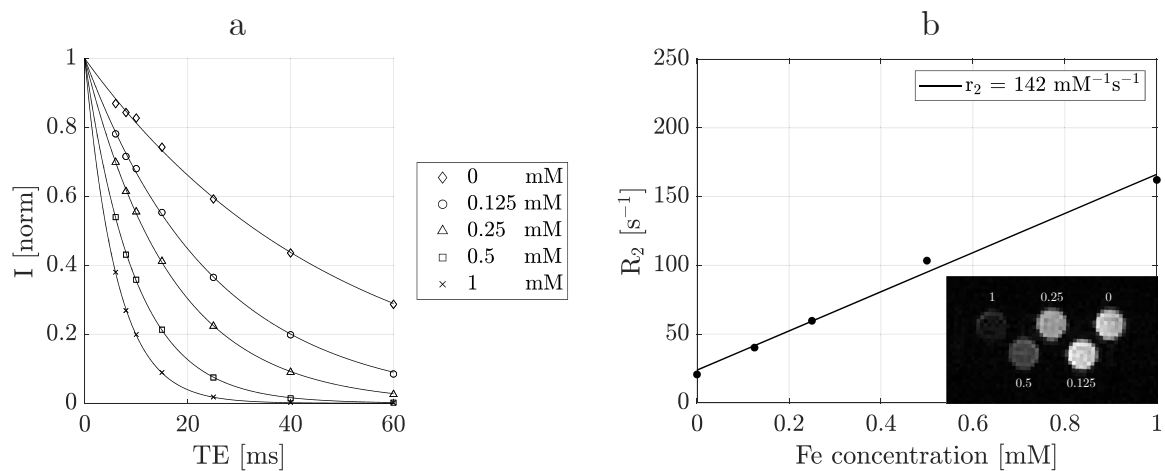

**Fig. S6.**

T<sub>2</sub> MRI integrated intensity plot (a) as a function of the echo time (TE) of phantom syringes with Ru-SPIONs at different iron concentrations in agarose. Transverse relaxivity plot ( $R_2$ ) as a function of the iron concentration (b). The insert shows one slice of the phantom, with TE of 25 ms.



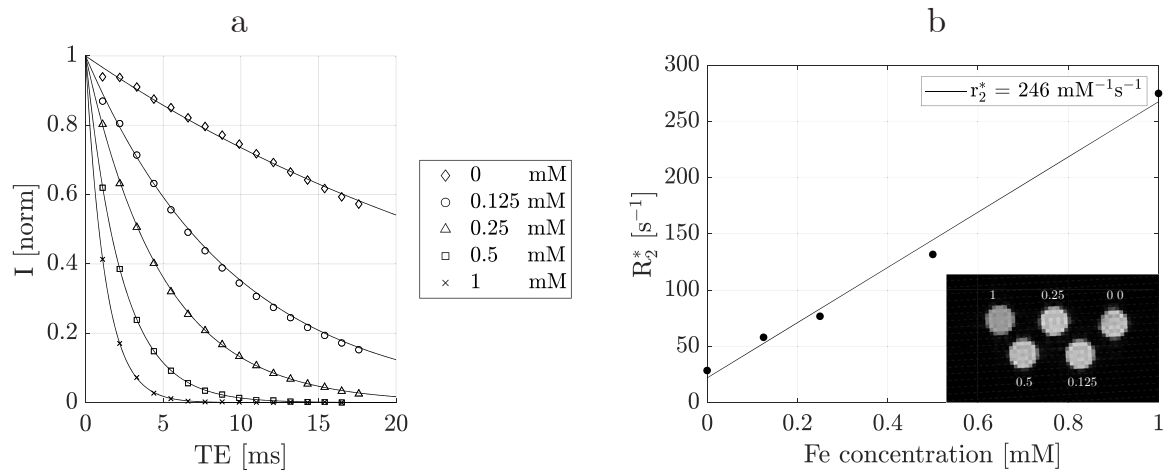

**Fig. S7.**

$T_2^*$  MRI integrated intensity plot (a) as a function of the echo time (TE) of phantom syringes with bare SPIONs at different iron concentrations in agarose. Transverse relaxivity plot ( $R_2^*$ ) as a function of the iron concentration (b). The insert shows one slice of the phantom, with TE of 2.2 ms.

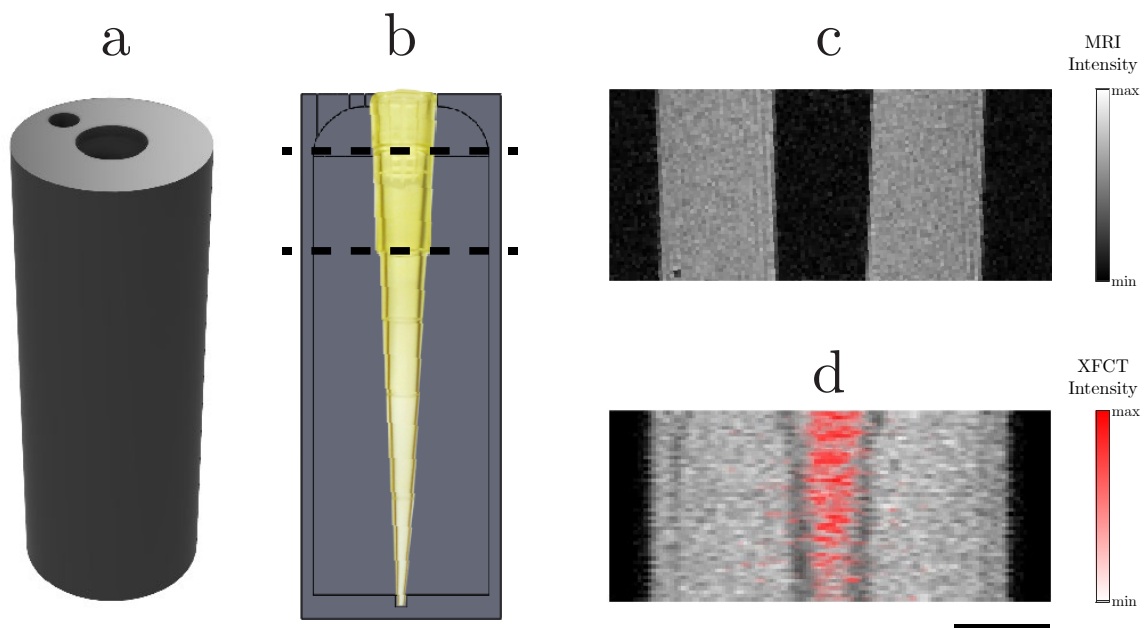

**Fig. S8.**

3D model (a) and schematic cross-section representation (b) of the 3D printed phantom for sensitivity studies. The samples are imaged with MRI and XFCT, by scanning 1 cm vertical region (within dashed lines). Representative images of phantom sagittal slices acquired with MRI (c) and XFCT (d) at 600  $\mu\text{g/mL}$  ( $[\text{Ru}] + [\text{Fe}]$ ). Scale bar indicates 5 mm.

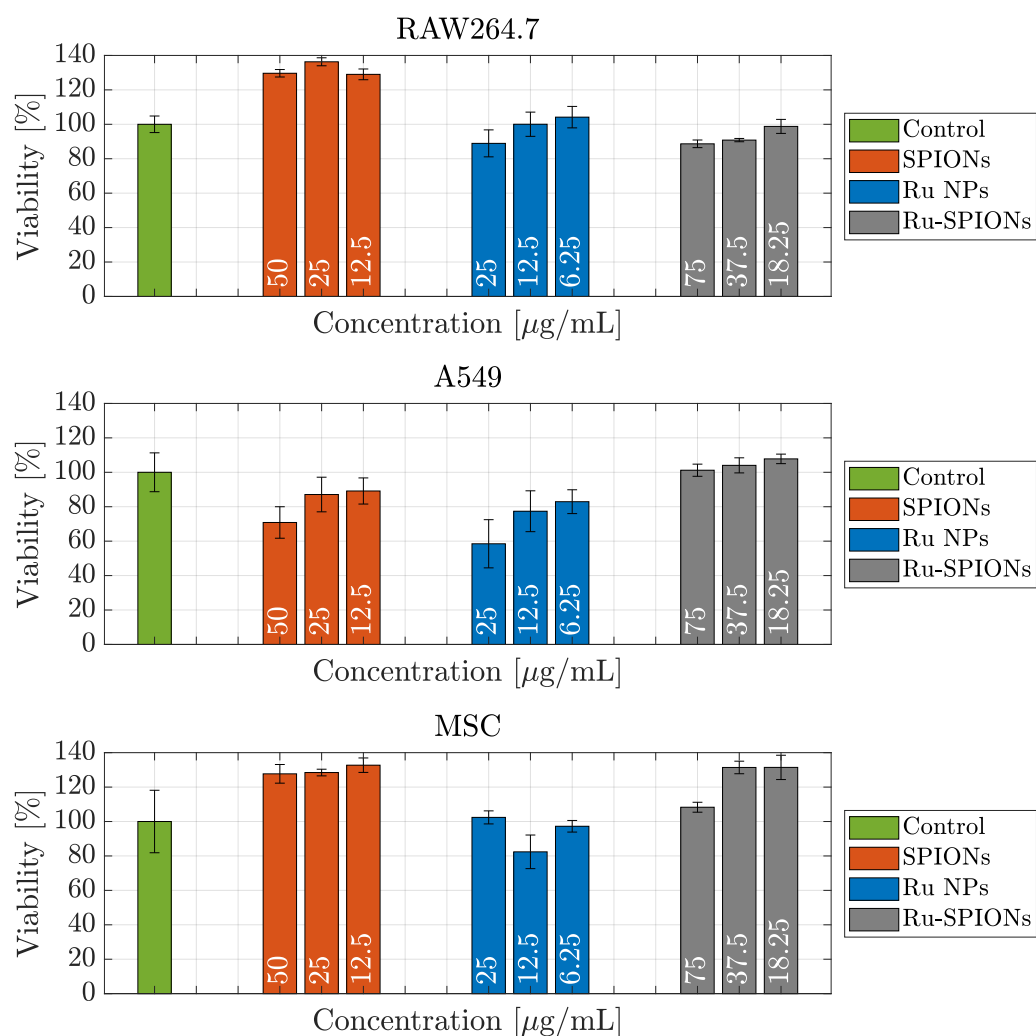

**Fig. S9.**

CellTiter-Glo® luminescent cell viability (CTG) assay on RAW264.7, A549, and MSC cell lines exposed for 48 h to three concentrations of SPIONs, Ru NPs, and Ru-SPIONs. The fluorescence signal of control (untreated) cells was used for normalization. In the hybrid Ru-SPIONs, the total metallic elemental concentration was kept the same as in the bare NPs ( $[\text{Ru}] + [\text{Fe}]$ ), considering the metal ratio  $[\text{Fe}]/[\text{Ru}] = 2$ . Error bars obtained from quadruplicates ( $\pm \sigma$ ).

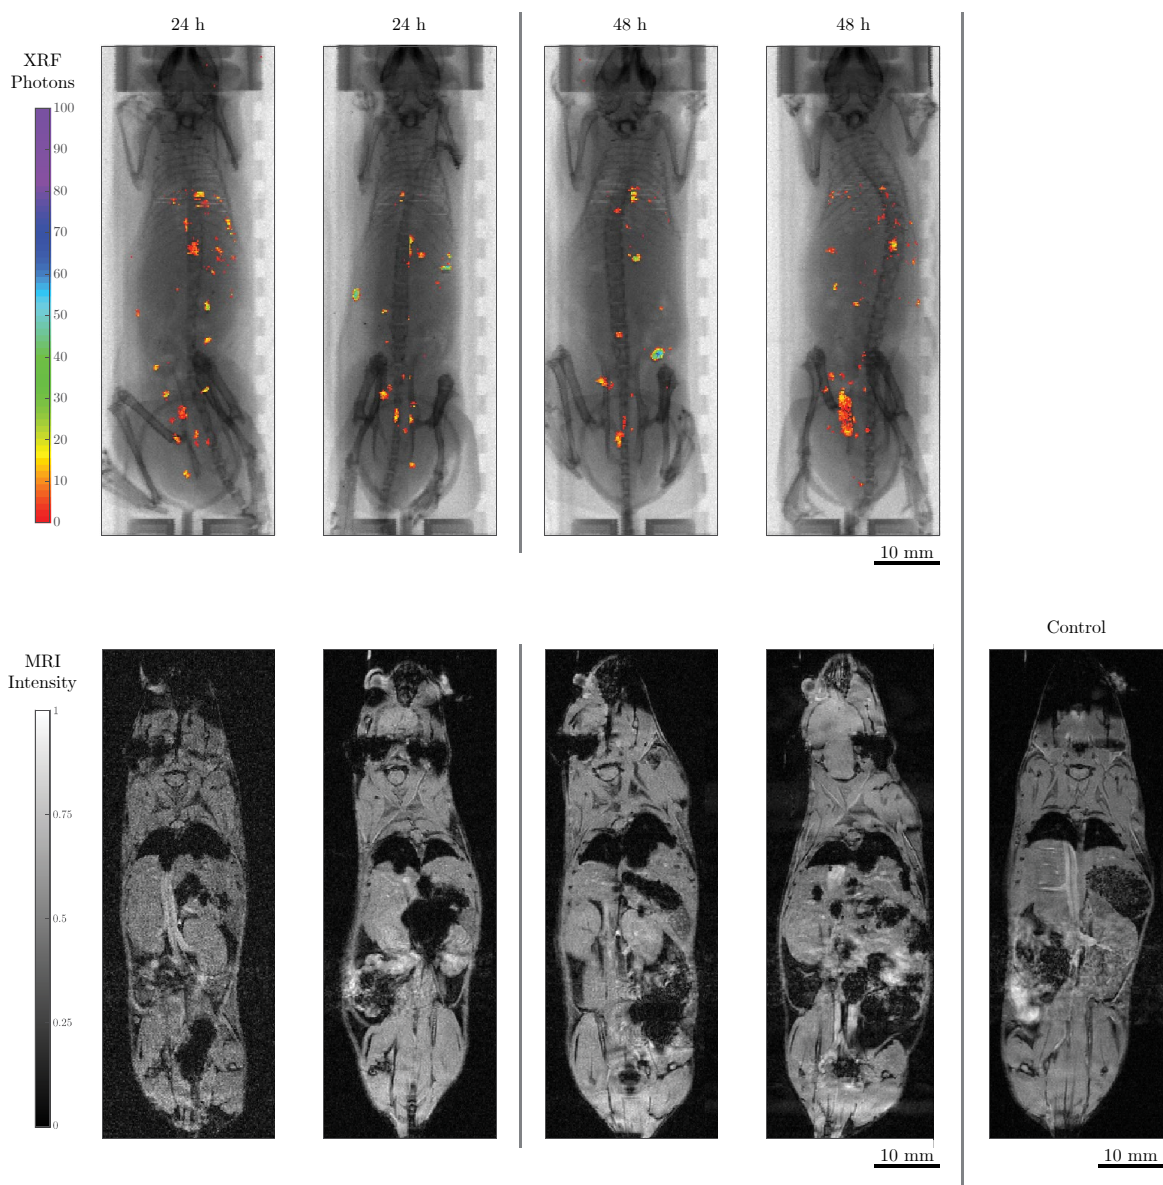

**Figure S10.**

*In vivo* XRF-MRI imaging with four different mice injected with Ru-SPIONs *via* an intraperitoneal (IP) injection ( $[\text{Ru}] = 20 \text{ mg/kg}$ ,  $[\text{Fe}] = 40 \text{ mg/kg}$ ). Mice were imaged after either 24 h or 48 h, as indicated. The full-body XRF projection images present both the absorption (grey scale) and X-ray fluorescence signal (color scale). One MRI slice was chosen for each mouse, allowing the multi-focal localization of the contrast agents. One mouse without injected NPs was scanned with MRI as the control. Scale bars are 10 mm.

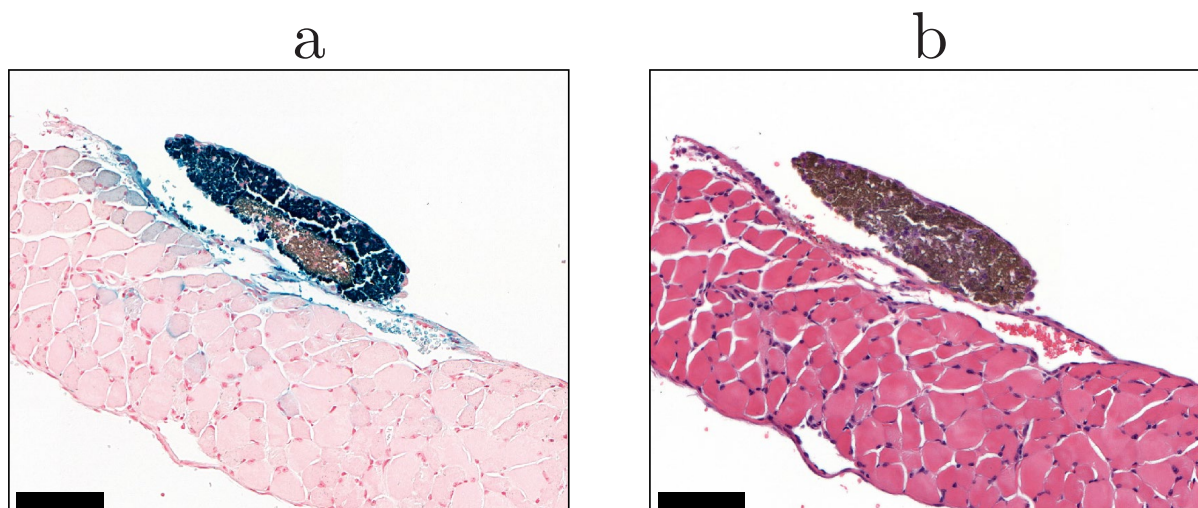

**Figure S11.**

Diaphragm section of a mouse injected with Ru-SPIONs *via* an intraperitoneal (IP) injection ([Ru] = 20 mg/kg, [Fe] = 40 mg/kg), and sacrificed after 48 h. The sections are stained with Prussian Blue (a) or H&E (b). Scale bars indicate 100 µm.

**Movie S1.**

*Ex vivo* full-body XFCT. 3D spatial localization of Ru-SPIONs injected in one mouse imaged after 24 h.

**Movie S2.**

*In vivo* local XFCT. Abdominal tomography of one mouse injected with Ru-SPIONs imaged after 48 h for 45 min, under general anesthesia.
